# Supplementary material for: An exceptional water stable terbium-based metal–organic framework for selective detection of pesticides
Source: Royal Society of Chemistry journal article supplement (doi:10.1039/d4ra06622g), 2024-01-01
Supplement: d4ra06622g1.pdf [file d4ra06622g1.pdf]

## Electronic Supplementary Information (ESI)

# Exceptional Water Stable Terbium–Based Metal–Organic Framework for Selective Detection of Pesticides

Ching-Ping Liu,<sup>\*a</sup> Ting-En Lin,<sup>a</sup> Jung-Chang Chiang,<sup>a</sup> Bo-Jhen Chen,<sup>a</sup> Po-Hsiu Chien,<sup>a</sup> Su-Ying Chien,<sup>b</sup> Gene-Hsiang Lee,<sup>b</sup> Yen-Hsiang Liu,<sup>\*a</sup> and Kuang-Lieh Lu<sup>\*a,c</sup>

---

<sup>a</sup>*Department of Chemistry, Fu Jen Catholic University, New Taipei City 242062, Taiwan*

<sup>b</sup>*Instrumentation Center, National Taiwan University, Taipei, 10617, Taiwan*

<sup>c</sup>*Institute of Chemistry, Academia Sinica, Taipei 115, Taiwan*

E-mail: [129723@mail.fju.edu.tw](mailto:129723@mail.fju.edu.tw) (C.-P. Liu)

[056461@gapp.fju.edu.tw](mailto:056461@gapp.fju.edu.tw) (Y.-H. Liu)

[kllu@gate.sinica.edu.tw](mailto:kllu@gate.sinica.edu.tw) (K.-L. Lu)

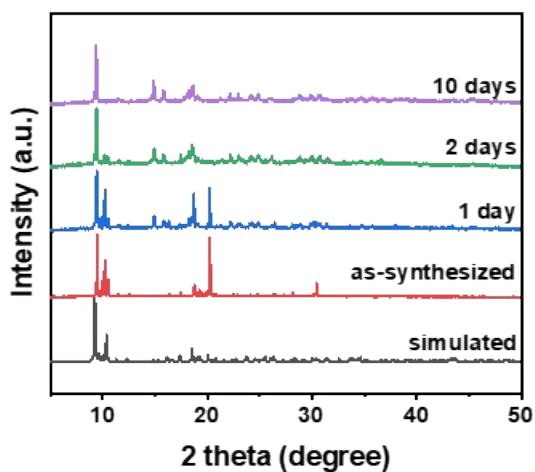

**Fig. S1** PXR D patterns of compound **1** before and after storage in deionized water for several days.

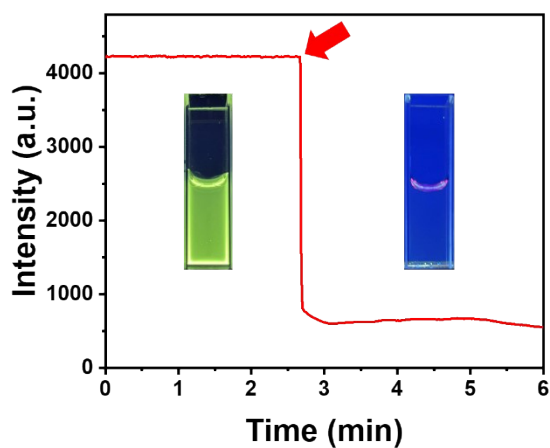

**Fig. S2** The time course of the emission decay centered at 545 nm from compound **1** in aqueous solution was obtained before and after the addition of TMX (the red arrow).

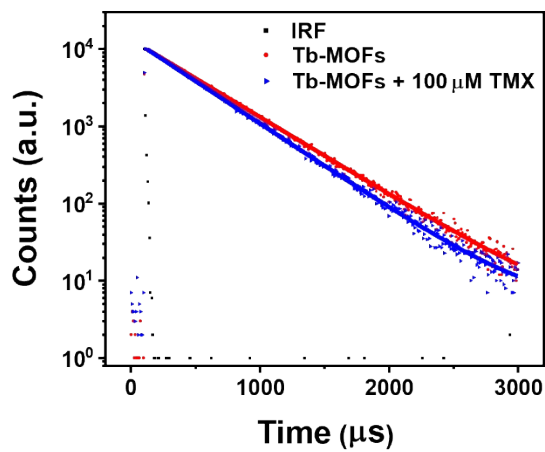

**Fig. S3** Emission decay profiles of compound **1** before and after the addition of TMX. The red and blue lines represent the fitting results.

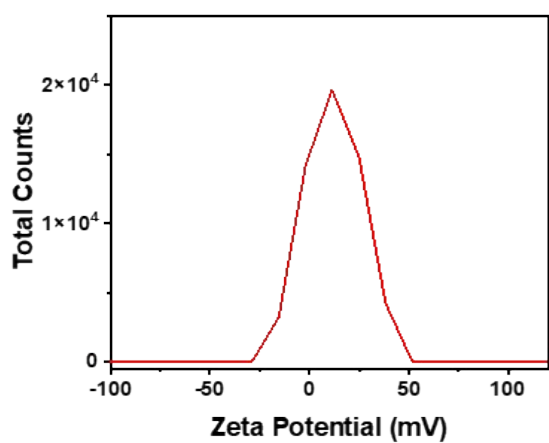

**Fig. S4** The zeta potential of compound **1** in deionized water (at 25  $^{\circ}\text{C}$ ).

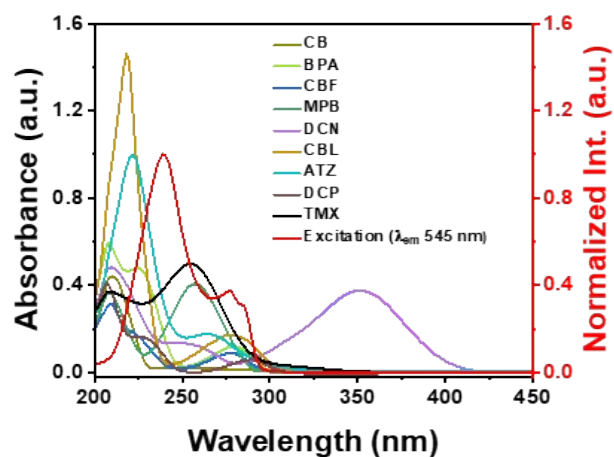

**Fig. S5** Absorption spectra of various pesticides with equivalent concentrations of 30  $\mu$ M compared with the excitation spectrum of compound **1**.

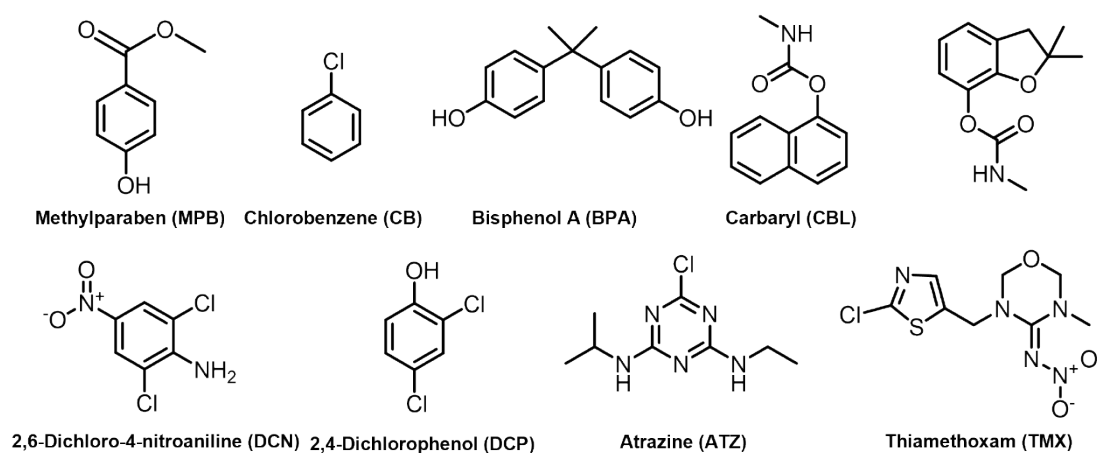

**Fig. S6** Chemical structures of various pesticides shown in Fig. 4c of the main text.

**Table S1.** A summary of MOF-based platform for detection of various pesticides.

| MOF-based platform                                                                                                         | Sensing target   | LOD (nM) | Ref. |
|----------------------------------------------------------------------------------------------------------------------------|------------------|----------|------|
| [Eu(EDTA)(DBM)]                                                                                                            | glyphosate       | 360      | 21   |
| [Cd(NH <sub>2</sub> -bdc)(azp)]·DMF                                                                                        | glyphosate       | 25       | 22   |
| (UiO-67/Ce-PC)                                                                                                             | glyphosate       | 37       | 23   |
| N-CDs@PCN-222                                                                                                              | glyphosate       | 54       | 24   |
| Cd-MOF-1                                                                                                                   | DCN              | 360      | 25   |
| Cd-MOF-2                                                                                                                   |                  | 120      |      |
| Zn-MOF                                                                                                                     | DCN              | 3840     | 26   |
| {[(CH <sub>3</sub> ) <sub>2</sub> NH <sub>2</sub> ] <sub>2</sub> [Pb(TCBPE)(H <sub>2</sub> O) <sub>2</sub> ]} <sub>n</sub> | DCN              | 260      | 27   |
| Cd-TM                                                                                                                      | DCN              | 7.6      | 28   |
| mMIP@MOF-76                                                                                                                | OPP              | 9        | 29   |
| NH <sub>2</sub> -CuBDC                                                                                                     | OPP              | 7        | 30   |
| Tb-MOF                                                                                                                     | OPP              | 11       | 31   |
| Z1200 MOF                                                                                                                  | OPP              | 0.009    | 32   |
| RhB@LMOF                                                                                                                   | parathion-methyl | 12000    | 33   |
| ZnPO-MOF                                                                                                                   | parathion-methyl | 0.456    | 34   |
| Zr-LMOF                                                                                                                    | parathion-methyl | 19       | 35   |
| [Cd(1,4-ndc)(DMA)]                                                                                                         | parathion-methyl | 3        | 36   |

|                                                                                                        |            |     |    |
|--------------------------------------------------------------------------------------------------------|------------|-----|----|
| [Tb(PMBB) <sub>1.5</sub> (H <sub>2</sub> O) <sub>2</sub> ]                                             |            | 710 |    |
|                                                                                                        | nitenpyram |     | 37 |
| [Eu(PMBB) <sub>1.5</sub> (H <sub>2</sub> O) <sub>2</sub> ]                                             |            | 770 |    |
|                                                                                                        | nitenpyram | 220 | 38 |
| UCNPs-PMOF                                                                                             |            |     |    |
|                                                                                                        | nitenpyram | 625 | 39 |
| Zn-CPTA                                                                                                |            |     |    |
|                                                                                                        | nitenpyram | 628 | 40 |
| [In <sub>3</sub> Tb <sub>3</sub> O <sub>3</sub> (TATAB) <sub>4</sub> (H <sub>2</sub> O) <sub>6</sub> ] |            |     |    |
|                                                                                                        | nitenpyram | 628 | 40 |
| ·12DMF·12H <sub>2</sub> O                                                                              |            |     |    |

---

DCN: 2,6-dichloro-4-nitroaniline

OPP: organophosphate pesticides

**Table S2.** Comparison of other compounds or nanomaterials using the fluorometric method for the detection of TMX with that for compound **1**.

| Materials                                              | Linear range ( $\mu\text{M}$ ) | LOD (nM) | Ref.      |
|--------------------------------------------------------|--------------------------------|----------|-----------|
| Tb-MOFs                                                | 45-155                         | 7300     | 41        |
| Tb <sup>3+</sup>                                       | 0.34-17.14                     | 100      | 64        |
| QDs                                                    | 0.04-2                         | 12.3     | 65        |
| B-CDs@MIPs/R-CDs                                       | 0.05-25                        | 13.5     | 66        |
| NH <sub>2</sub> -SiO <sub>2</sub> @CsPbBr <sub>3</sub> | 0.0144-0.0624                  | 4.11     | 67        |
| Tb-MOFs (compound <b>1</b> )                           | 0 – 40                         | 30       | This work |

## X-ray crystallography measurements

A single crystal of **1** suitable for crystallographic analysis was measured at 150K for intensity data collection on a Bruker D8 VENTURE diffractometer fitted with graphite monochromated Mo-K $\alpha$  ( $\lambda = 0.71073$  Å) radiation. Data reduction included absorption corrections by the MULTI-SCAN method, using SAINT<sup>[1]</sup> and SADABS.<sup>[2]</sup> Crystal data and experimental details are given in Table S1. The X-ray structure was determined by direct methods and difference Fourier techniques and were refined by full-matrix least squares, using SHELXT.<sup>[3,4]</sup> For **1**, all non-hydrogen atoms were refined anisotropically except for the DEF and guest water molecules. The hydrogen atoms of guest water molecules are located in a difference Fourier map. The O-bound H atoms were refined in the riding-model approximation with  $U_{\text{iso}}(\text{H}) = 1.5U_{\text{eq}}(\text{O})$ . The C-bound H atoms were placed in calculated positions and refined as riding model with  $U_{\text{iso}}(\text{H}) = 1.2U_{\text{eq}}(\text{O})$ . The coordinated DEF molecule was observed to present two-site disordered behaviour. The site-occupancy of the disordered DEF molecule was refined to be 0.55 and 0.45. For guest water molecule, only half occupancy was assigned and was refined anisotropically. Also, due to the disorderness, the H atom position of the guest water molecule was only approximately assigned based on an optimised calculated position. Crystallographic CIF data for **Tb-FJU7** have been deposited at the Cambridge Crystallographic Data Center, under the deposition number of CCDC 2378574.



**Table S3.** Crystal data and structure refinement for compound **1**.

|                                              |                                                                                |                              |
|----------------------------------------------|--------------------------------------------------------------------------------|------------------------------|
| Identification code                          | ic22483                                                                        |                              |
| Empirical formula                            | C <sub>34</sub> H <sub>36</sub> N <sub>2</sub> O <sub>15</sub> Tb <sub>2</sub> |                              |
| Formula weight                               | 1030.49                                                                        |                              |
| Temperature                                  | 150(2) K                                                                       |                              |
| Wavelength                                   | 0.71073 Å                                                                      |                              |
| Crystal system                               | Monoclinic                                                                     |                              |
| Space group                                  | <i>C2/c</i>                                                                    |                              |
| Unit cell dimensions                         | <i>a</i> = 17.9401(7) Å                                                        | $\alpha = 90^\circ$          |
|                                              | <i>b</i> = 11.5274(5) Å                                                        | $\beta = 109.0656(12)^\circ$ |
|                                              | <i>c</i> = 18.6602(7) Å                                                        | $\gamma = 90^\circ$          |
| Volume                                       | 3647.3(3) Å <sup>3</sup>                                                       |                              |
| Z                                            | 4                                                                              |                              |
| Density (calculated)                         | 1.877 Mg/m <sup>3</sup>                                                        |                              |
| Absorption coefficient                       | 3.920 mm <sup>-1</sup>                                                         |                              |
| <i>F</i> (000)                               | 2016                                                                           |                              |
| Crystal size                                 | 0.153 x 0.127 x 0.094 mm <sup>3</sup>                                          |                              |
| Theta range for data collection              | 2.136 to 30.000°                                                               |                              |
| Index ranges                                 | -25 ≤ <i>h</i> ≤ 25, -16 ≤ <i>k</i> ≤ 16, -26 ≤ <i>l</i> ≤ 26                  |                              |
| Reflections collected                        | 46223                                                                          |                              |
| Independent reflections                      | 5309 [R(int) = 0.0574]                                                         |                              |
| Completeness to theta = 25.242°              | 99.9 %                                                                         |                              |
| Absorption correction                        | Semi-empirical from equivalents                                                |                              |
| Max. and min. transmission                   | 0.6042 and 0.5451                                                              |                              |
| Refinement method                            | Full-matrix least-squares on <i>F</i> <sup>2</sup>                             |                              |
| Data / restraints / parameters               | 5309 / 83 / 264                                                                |                              |
| Goodness-of-fit on <i>F</i> <sup>2</sup>     | 1.279                                                                          |                              |
| Final R indices [ <i>I</i> > 2σ( <i>I</i> )] | R1 = 0.0307, wR2 = 0.0711                                                      |                              |
| R indices (all data)                         | R1 = 0.0347, wR2 = 0.0738                                                      |                              |
| Extinction coefficient                       | n/a                                                                            |                              |
| Largest diff. peak and hole                  | 2.370 and -2.048 e.Å <sup>-3</sup>                                             |                              |

---

$$R1 = \frac{\sum |F_o| - |F_c|}{\sum |F_o|} \quad wR2 = \left\{ \frac{\sum [w(F_o^2 - F_c^2)^2]}{\sum [w(F_o^2)^2]} \right\}^{1/2}$$

---

**Table S4.** Bond lengths [ $\text{\AA}$ ] and angles [ $^\circ$ ] for compound **1** (ic22483).

|               |           |                      |            |
|---------------|-----------|----------------------|------------|
| Tb(1)-O(1)    | 2.258(2)  | C(16')-C(17')        | 1.498(19)  |
| Tb(1)-O(2)#1  | 2.302(2)  | O(1)-Tb(1)-O(2)#1    | 83.47(8)   |
| Tb(1)-O(3)#2  | 2.312(3)  | O(1)-Tb(1)-O(3)#2    | 103.11(12) |
| Tb(1)-O(4)#3  | 2.325(3)  | O(2)#1-Tb(1)-O(3)#2  | 73.94(11)  |
| Tb(1)-O(5)    | 2.356(3)  | O(1)-Tb(1)-O(4)#3    | 104.01(9)  |
| Tb(1)-O(6)#4  | 2.365(2)  | O(2)#1-Tb(1)-O(4)#3  | 145.51(10) |
| Tb(1)-O(7)    | 2.411(3)  | O(3)#2-Tb(1)-O(4)#3  | 133.99(11) |
| Tb(1)-O(5)#4  | 2.846(3)  | O(1)-Tb(1)-O(5)      | 81.82(9)   |
| Tb(1)-C(12)#4 | 2.968(3)  | O(2)#1-Tb(1)-O(5)    | 141.77(10) |
| O(1)-C(7)     | 1.282(4)  | O(3)#2-Tb(1)-O(5)    | 75.37(12)  |
| O(2)-C(7)     | 1.233(4)  | O(4)#3-Tb(1)-O(5)    | 72.57(11)  |
| O(3)-C(8)     | 1.258(5)  | O(1)-Tb(1)-O(6)#4    | 150.57(8)  |
| O(4)-C(8)     | 1.260(5)  | O(2)#1-Tb(1)-O(6)#4  | 77.41(9)   |
| O(5)-C(12)    | 1.265(4)  | O(3)#2-Tb(1)-O(6)#4  | 92.93(12)  |
| O(6)-C(12)    | 1.253(4)  | O(4)#3-Tb(1)-O(6)#4  | 80.84(10)  |
| O(7)-C(13)    | 1.212(5)  | O(5)-Tb(1)-O(6)#4    | 126.55(9)  |
| C(1)-C(6)     | 1.393(4)  | O(1)-Tb(1)-O(7)      | 76.09(9)   |
| C(1)-C(2)     | 1.397(5)  | O(2)#1-Tb(1)-O(7)    | 78.06(9)   |
| C(1)-C(7)     | 1.496(5)  | O(3)#2-Tb(1)-O(7)    | 151.87(11) |
| C(2)-C(3)     | 1.387(5)  | O(4)#3-Tb(1)-O(7)    | 71.47(9)   |
| C(3)-C(4)     | 1.390(5)  | O(5)-Tb(1)-O(7)      | 131.18(10) |
| C(4)-C(5)     | 1.392(5)  | O(6)#4-Tb(1)-O(7)    | 78.18(9)   |
| C(4)-C(8)     | 1.501(6)  | O(1)-Tb(1)-O(5)#4    | 160.09(8)  |
| C(5)-C(6)     | 1.385(5)  | O(2)#1-Tb(1)-O(5)#4  | 112.56(9)  |
| C(9)-C(11)    | 1.393(5)  | O(3)#2-Tb(1)-O(5)#4  | 71.97(11)  |
| C(9)-C(10)    | 1.394(5)  | O(4)#3-Tb(1)-O(5)#4  | 69.87(9)   |
| C(9)-C(12)    | 1.505(5)  | O(5)-Tb(1)-O(5)#4    | 78.27(10)  |
| C(10)-C(11)#5 | 1.387(5)  | O(6)#4-Tb(1)-O(5)#4  | 48.94(8)   |
| N(1)-C(13)    | 1.312(6)  | O(7)-Tb(1)-O(5)#4    | 117.58(9)  |
| N(1)-C(14')   | 1.432(11) | O(1)-Tb(1)-C(12)#4   | 174.09(9)  |
| N(1)-C(14)    | 1.465(9)  | O(2)#1-Tb(1)-C(12)#4 | 94.38(10)  |
| N(1)-C(16)    | 1.475(9)  | O(3)#2-Tb(1)-C(12)#4 | 81.50(12)  |
| N(1)-C(16')   | 1.548(12) | O(4)#3-Tb(1)-C(12)#4 | 74.72(11)  |
| C(14)-C(15)   | 1.493(15) | O(5)-Tb(1)-C(12)#4   | 103.09(10) |
| C(16)-C(17)   | 1.496(16) | O(6)#4-Tb(1)-C(12)#4 | 23.93(9)   |
| C(14')-C(15') | 1.480(17) | O(7)-Tb(1)-C(12)#4   | 98.08(10)  |

|                      |            |                    |           |
|----------------------|------------|--------------------|-----------|
| O(5)#4-Tb(1)-C(12)#4 | 25.03(9)   | O(3)-C(8)-C(4)     | 117.4(4)  |
| C(7)-O(1)-Tb(1)      | 138.0(2)   | O(4)-C(8)-C(4)     | 117.4(4)  |
| C(7)-O(2)-Tb(1)#1    | 162.9(2)   | C(11)-C(9)-C(10)   | 120.3(3)  |
| C(8)-O(3)-Tb(1)#6    | 136.5(3)   | C(11)-C(9)-C(12)   | 119.3(3)  |
| C(8)-O(4)-Tb(1)#3    | 141.1(3)   | C(10)-C(9)-C(12)   | 120.4(3)  |
| C(12)-O(5)-Tb(1)     | 171.3(3)   | C(11)#5-C(10)-C(9) | 119.3(3)  |
| C(12)-O(5)-Tb(1)#4   | 82.9(2)    | C(10)#5-C(11)-C(9) | 120.4(3)  |
| Tb(1)-O(5)-Tb(1)#4   | 101.73(10) | O(6)-C(12)-O(5)    | 121.9(3)  |
| C(12)-O(6)-Tb(1)#4   | 106.1(2)   | O(6)-C(12)-C(9)    | 117.8(3)  |
| C(13)-O(7)-Tb(1)     | 126.7(3)   | O(5)-C(12)-C(9)    | 120.2(3)  |
| C(6)-C(1)-C(2)       | 119.6(3)   | O(6)-C(12)-Tb(1)#4 | 49.94(17) |
| C(6)-C(1)-C(7)       | 120.8(3)   | O(5)-C(12)-Tb(1)#4 | 72.1(2)   |
| C(2)-C(1)-C(7)       | 119.5(3)   | C(9)-C(12)-Tb(1)#4 | 167.3(2)  |
| C(3)-C(2)-C(1)       | 120.0(3)   | C(13)-N(1)-C(14')  | 119.0(5)  |
| C(2)-C(3)-C(4)       | 120.2(4)   | C(13)-N(1)-C(14)   | 119.7(5)  |
| C(3)-C(4)-C(5)       | 119.8(4)   | C(13)-N(1)-C(16)   | 116.6(5)  |
| C(3)-C(4)-C(8)       | 121.0(4)   | C(14)-N(1)-C(16)   | 116.4(6)  |
| C(5)-C(4)-C(8)       | 119.0(3)   | C(13)-N(1)-C(16')  | 124.5(6)  |
| C(6)-C(5)-C(4)       | 120.2(3)   | C(14')-N(1)-C(16') | 102.0(7)  |
| C(5)-C(6)-C(1)       | 120.2(3)   | O(7)-C(13)-N(1)    | 127.5(4)  |
| O(2)-C(7)-O(1)       | 124.3(3)   | N(1)-C(14)-C(15)   | 115.3(9)  |
| O(2)-C(7)-C(1)       | 118.9(3)   | N(1)-C(16)-C(17)   | 107.5(8)  |
| O(1)-C(7)-C(1)       | 116.8(3)   | N(1)-C(14')-C(15') | 114.7(10) |
| O(3)-C(8)-O(4)       | 125.2(4)   | C(17')-C(16')-N(1) | 107.6(10) |

---

Symmetry transformations used to generate equivalent atoms:

#1  $-x+1, y, -z+1/2$     #2  $x-1/2, y-1/2, z$     #3  $-x+3/2, -y+3/2, -z+1$   
#4  $-x+1, -y+1, -z+1$     #5  $-x+3/2, -y+1/2, -z+1$     #6  $x+1/2, y+1/2, z$

## References

- [1] SAINT, Bruker (2003), Bruker AXS Inc., Madison Wisconsin, USA.
- [2] SADABS, Bruker (2002), Bruker AXS Inc, Madison Wisconsin, USA.
- [3] G. M. Sheldrick, *Acta Crystallogr., Sect. A: Found. Crystallogr.*, 2008, **64**, 112–122.
- [4] A. L. Spek, *J. Appl. Crystallogr.*, 2003, **36**, 7–13.
